# Supplementary material for: Lumbar Paravertebral Muscle Pain Management Using Kinesitherapy and Electrotherapeutic Modalities
Source: MDPI journal article supplement (doi:10.3390/healthcare12080853), 2024-04-18
Supplement: s1 [file s1]

**Table S9.** Evolution of mobility and disability parameters.

|          | Oswestry Index - AVG(SD) |            |            | FFDI- AVG(SD) |            |            |
|----------|--------------------------|------------|------------|---------------|------------|------------|
|          | T1-T2                    | T2-T3      | T1-T3      | T1-T2         | T2-T3      | T1-T3      |
| G1 Group | 33.63±9.38               | 23.46±9.56 | 16.17±7.98 | 24.61±2.06    | 15.61±0.49 | 8.22±0.85  |
| G2 Group | 38.63±7.29               | 31.07±7.57 | 24.12±7.15 | 23.61±1.05    | 21.12±1.22 | 19.61±1.81 |
