# Supplementary material for: Lumbar Paravertebral Muscle Pain Management Using Kinesitherapy and Electrotherapeutic Modalities
Source: MDPI journal article supplement (doi:10.3390/healthcare12080853), 2024-04-18
Supplement: s1 [file s1]

**Table S6.** Evolution of physiological parameters HR and SAT O<sub>2</sub> in study batches.

|          | HR- AVG(SD) |             |            | SAT O <sub>2</sub> - AVG(SD) |            |            |
|----------|-------------|-------------|------------|------------------------------|------------|------------|
|          | T1-T2       | T2-T3       | T1-T3      | T1-T2                        | T2-T3      | T1-T3      |
| G1 Group | 83.35±10.67 | 75.35±11.63 | 76.44±7.91 | 96.56±1.01                   | 97.53±6.82 | 97.79±0.77 |
| G2 Group | 78.21±12.13 | 76.23±11.32 | 70.66±7.97 | 96.64±0.87                   | 97.02±0.82 | 96.86±0.88 |
