# Supplementary material for: Lumbar Paravertebral Muscle Pain Management Using Kinesitherapy and Electrotherapeutic Modalities
Source: MDPI journal article supplement (doi:10.3390/healthcare12080853), 2024-04-18
Supplement: s1 [file s1]

**Table S7.** Evolution of physiological parameters SBP and DBP in study batches.

|          | SBP- AVG(SD) |             |             | DBP- AVG(SD) |            |            |
|----------|--------------|-------------|-------------|--------------|------------|------------|
|          | T1-T2        | T2-T3       | T1-T3       | T1-T2        | T2-T3      | T1-T3      |
| G1 Group | 129.79±5.52  | 115.65±7.64 | 116.37±7.53 | 79.81±6.89   | 69.91±7.91 | 73.15±6.45 |
| G2 Group | 134.09±5.66  | 120.5±7.18  | 123.23±6.84 | 82.05±5.81   | 73.43±8.06 | 76.84±5.79 |
