# Supplementary material for: Lumbar Paravertebral Muscle Pain Management Using Kinesitherapy and Electrotherapeutic Modalities
Source: MDPI journal article supplement (doi:10.3390/healthcare12080853), 2024-04-18
Supplement: s1 [file s1]

**Tabel S4.** Evolution of pain parameters and functional assessment.

|          | VAS- AVG(SD) |           |           | LBP-M- AVG(SD) |            |            |
|----------|--------------|-----------|-----------|----------------|------------|------------|
|          | T1-T2        | T2-T3     | T1-T3     | T1-T2          | T2-T3      | T1-T3      |
| G1 Group | 8.19±0.39    | 5.51±0.59 | 3.47±0.63 | 8.68±0.86      | 16.34±1.34 | 25.26±1.49 |
| G2 Group | 7.71±0.62    | 5.64±0.72 | 3.68±0.83 | 8.75±1.14      | 16.18±1.74 | 23.19±2.08 |
