# Supplementary material for: Lumbar Paravertebral Muscle Pain Management Using Kinesitherapy and Electrotherapeutic Modalities
Source: MDPI journal article supplement (doi:10.3390/healthcare12080853), 2024-04-18
Supplement: s1 [file s1]

**Table S8.** Evolution of pain parameters and functional assessment.

|          | VAS- AVG(SD) |           |           | LBP-M- AVGSD) |            |            |
|----------|--------------|-----------|-----------|---------------|------------|------------|
|          | T1-T2        | T2-T3     | T1-T3     | T1-T2         | T2-T3      | T1-T3      |
| G1 Group | 8.19±0.51    | 5.68±0.82 | 3.71±0.84 | 8.81±0.93     | 16.15±1.49 | 25.46±1.16 |
| G2 Group | 7.74±0.62    | 5.58±0.66 | 3.61±0.69 | 8.88±1.45     | 16.26±1.82 | 24.42±1.97 |
