# Supplementary material for: Lumbar Paravertebral Muscle Pain Management Using Kinesitherapy and Electrotherapeutic Modalities
Source: MDPI journal article supplement (doi:10.3390/healthcare12080853), 2024-04-18
Supplement: s1 [file s1]

**Tabel S5.** Evolution of mobility and disability parameters.

|          | Oswestry Index - AVG(SD) |            |            | FFDI- AVG(SD) |            |            |
|----------|--------------------------|------------|------------|---------------|------------|------------|
|          | T1-T2                    | T2-T3      | T1-T3      | T1-T2         | T2-T3      | T1-T3      |
| G1 Group | 36.17±9.73               | 26.09±9.98 | 18.49±8.43 | 25.21±1.98    | 15.49±0.74 | 8.12±0.54  |
| G2 Group | 38.21±7.21               | 31.05±7.35 | 24.41±7.21 | 23.84±0.94    | 21.27±1.21 | 19.43±2.18 |
