# Supplementary material for: Lumbar Paravertebral Muscle Pain Management Using Kinesitherapy and Electrotherapeutic Modalities
Source: MDPI journal article supplement (doi:10.3390/healthcare12080853), 2024-04-18
Supplement: s1 [file s1]

**Table S10.** Evolution of physiological parameters HR and SAT O<sub>2</sub> in study batches.

|          | HR- AVG(SD) |             |             | SAT O <sub>2</sub> - AVG(SD) |            |            |
|----------|-------------|-------------|-------------|------------------------------|------------|------------|
|          | T1-T2       | T2-T3       | T1-T3       | T1-T2                        | T2-T3      | T1-T3      |
| G1 Group | 88.78±14.25 | 75.29±15.79 | 77.05±10.39 | 96.37±0.94                   | 97.51±0.75 | 97.63±0.73 |
| G2 Group | 76.09±11.23 | 77.63±13.37 | 70.31±7.76  | 96.37±0.58                   | 96.74±0.65 | 96.56±0.67 |
