# Supplementary material for: Lumbar Paravertebral Muscle Pain Management Using Kinesitherapy and Electrotherapeutic Modalities
Source: MDPI journal article supplement (doi:10.3390/healthcare12080853), 2024-04-18
Supplement: s1 [file s1]

**Table S11.** Evolution of physiological parameters in study batches.

|          | SBP – AVG(SD) |             |             | DBP- AVG(SD) |            |            |
|----------|---------------|-------------|-------------|--------------|------------|------------|
|          | T1-T2         | T2-T3       | T1-T3       | T1-T2        | T2-T3      | T1-T3      |
| G1 Group | 130.22±5.64   | 115.44±7.93 | 115.81±7.81 | 80.51±6.69   | 68.58±7.69 | 73.09±5.59 |
| G2 Group | 132.91±6.41   | 118.21±7.89 | 121.77±7.06 | 81.05±5.71   | 72.51±6.25 | 76.21±5.43 |
