# Supplementary material for: Lumbar Paravertebral Muscle Pain Management Using Kinesitherapy and Electrotherapeutic Modalities
Source: MDPI journal article supplement (doi:10.3390/healthcare12080853), 2024-04-18
Supplement: s1 [file s1]

**Table S1.** Evolution of pain parameters and functional assessment.

|          | VAS -AVG(SD) |           |           | LBP-M AVG(SD) |            |            |
|----------|--------------|-----------|-----------|---------------|------------|------------|
|          | T1-T2        | T2-T3     | T1-T3     | T1-T2         | T2-T3      | T1-T3      |
| G1 Group | 8.19±0.45    | 5.59±0.71 | 3.58±0.75 | 8.74±0.89     | 16.25±1.41 | 25.35±1.34 |
| G2 Group | 7.72±0.62    | 5.59±0.69 | 3.61±0.78 | 8.81±1.29     | 16.23±1.77 | 24.15±2.02 |
