# Supplementary material for: Lumbar Paravertebral Muscle Pain Management Using Kinesitherapy and Electrotherapeutic Modalities
Source: MDPI journal article supplement (doi:10.3390/healthcare12080853), 2024-04-18
Supplement: s1 [file s1]

**Table S2.** Evolution of mobility and disability parameters.

|          | Oswestry Index - AVG(SD) |            |            | FFDI-AVG(SD) |            |            |
|----------|--------------------------|------------|------------|--------------|------------|------------|
|          | T1-T2                    | T2-T3      | T1-T3      | T1-T2        | T2-T3      | T1-T3      |
| G1 Group | 34.89±9.54               | 24.73±9.78 | 17.25±8.25 | 24.89±2.03   | 15.54±0.63 | 8.05±0.82  |
| G2 Group | 38.64±7.29               | 31.28±7.51 | 24.5±7.25  | 23.72±0.99   | 21.21±1.21 | 19.53±1.99 |
