# Supplementary material for: Lumbar Paravertebral Muscle Pain Management Using Kinesitherapy and Electrotherapeutic Modalities
Source: MDPI journal article supplement (doi:10.3390/healthcare12080853), 2024-04-18
Supplement: s1 [file s1]

**Table S3.** Evolution of physiological parameters in study batches.

|   | SBP- AVG(SD) |        |        | DBP- AVG(SD) |       |       | HR- AVG(SD) |        |       | SAT O <sub>2</sub> - AVG(SD) |       |       |
|---|--------------|--------|--------|--------------|-------|-------|-------------|--------|-------|------------------------------|-------|-------|
|   | T1-T2        | T2-T3  | T1-T3  | T1-T2        | T2-T3 | T1-T3 | T1-T2       | T2-T3  | T1-T3 | T1-T2                        | T2-T3 | T1-T3 |
| G | 130±5.       | 116±7. | 116±7. | 80±6.        | 70±7. | 73±6. | 83±10.      | 75±11. | 76±7. | 97±1.                        | 98±6. | 98±0. |
| 1 | 5            | 6      | 5      | 9            | 9     | 5     | 7           | 6      | 9     | 1                            | 8     | 8     |
| G | 134±5.       | 121±7. | 123±6. | 82±5.        | 73±8. | 77±5. | 78±12.      | 76±11. | 71±7. | 97±0.                        | 97±0. | 97±0. |
| 2 | 8            | 2      | 8      | 8            | 1     | 8     | 1           | 3      | 9     | 8                            | 8     | 9     |
